# Supplementary material for: A specialized MreB-dependent cell wall biosynthetic complex mediates the formation of stalk-specific peptidoglycan in Caulobacter crescentus
Source: PubMed Central journal article supplement (PMC6373972; doi:10.1371/journal.pgen.1007897), 2019-02-01
Supplement: pgen.1007897.s012.pdf [file pgen.1007897.s012.pdf]

**Table S1.** Composition of cell body and stalk peptidoglycan from from crossband- and LD-transpeptidase-deficient cells. The indicated strains were analyzed after growth for 24 h in M2G<sup>-P</sup>. Values are the mean ± variance of two independent experiments.

| Muropeptide                              | Relative percentage (%) in strain |          |               |          |               |          |
|------------------------------------------|-----------------------------------|----------|---------------|----------|---------------|----------|
|                                          | WT (CB15N)                        |          | <i>ΔstpAB</i> |          | <i>ΔldtDX</i> |          |
|                                          | Cell body                         | Stalk    | Cell body     | Stalk    | Cell body     | Stalk    |
| Tri                                      | 0.8±0.0                           | 1.4±0.0  | 1.5±0.0       | 3.3±0.0  | n.d.          | n.d.     |
| Tetra                                    | 16.5±0.4                          | 11.1±6.6 | 19.3±0.3      | 12.1±3.5 | 19.3±0.1      | 13.6±0.0 |
| Penta                                    | 7.9±0.0                           | 6.5±0.1  | 8.9±0.0       | 6.6±0.0  | 8.6±0.0       | 7.8±0.0  |
| TriTri (LD)                              | 0.3±0.0                           | 0.9±0.0  | 0.2±0.1       | 1.2±0.2  | n.d.          | n.d.     |
| TetraTri (LD)                            | 1.0±0.1                           | 2.9±0.1  | 0.6±0.0       | 2.2±0.2  | n.d.          | n.d.     |
| TriAnh/TetraTri (LD)                     | 1.1±0.0                           | 1.3±0.0  | 1.1±0.0       | 1.9±0.0  | n.d.          | n.d.     |
| TetraTetra(LD)                           | 1.3±1.1                           | 1.5±0.0  | 0.4±0.0       | 1.4±0.0  | 0.2±0.0       | 0.2±0.0  |
| TetraTetra                               | 12.7±0.0                          | 10.8±1.5 | 14.6±0.1      | 10.4±0.1 | 14.3±0.0      | 13.5±0.0 |
| TetraPenta                               | 6.8±0.1                           | 7.0±0.0  | 7.9±0.0       | 6.9±0.0  | 7.4±0.0       | 8.5±0.0  |
| TetraTetraTri or TetraTetraTri (LD)      | 0.3±0.0                           | 1.2±0.0  | 0.2±0.0       | 1.0±0.0  | n.d.          | n.d.     |
| TetraAnh                                 | 1.4±0.0                           | 1.7±0.0  | 1.1±0.0       | 0.8±0.0  | 1.2±0.0       | 1.2±0.0  |
| TetraTetraTetra                          | 3.8±0.0                           | 5.1±0.0  | 4.1±0.0       | 4.8±0.1  | 4.2±0.0       | 5.9±0.0  |
| TetraTetraPenta                          | 1.8±0.0                           | 3.0±0.0  | 1.9±0.0       | 2.6±0.0  | 2.1±0.0       | 3.2±0.0  |
| TetraTetraTetraTetra                     | n.d.                              | 0.3±0.2  | n.d.          | 0.5±0.0  | n.d.          | n.d.     |
| TetraTetraTetraPenta                     | n.d.                              | 0.6±0.2  | n.d.          | 0.3±0.0  | n.d.          | n.d.     |
| PentaAnh                                 | 0.8±0.0                           | 1.6±0.2  | 0.7±0.0       | 1.4±0.0  | 0.8±0.0       | 1.7±0.0  |
| TetraTetraAnh                            | 1.0±0.0                           | 2.0±0.0  | 0.7±0.2       | 1.1±0.0  | 0.8±0.0       | 0.6±0.0  |
| TetraPentaAnh                            | 3.6±0.0                           | 3.1±0.0  | 2.3±0.0       | 1.9±0.0  | 2.5±0.0       | 2.6±0.0  |
| TetraTetraTriAnh or TetraTetraTri(LD)Anh | 0.6±0.0                           | 1.3±0.0  | 0.7±0.0       | 1.8±0.0  | 1.3±0.0       | 1.9±0.0  |
| TetraTetraTetraAnh                       | 6.4±0.1                           | 6.2±0.0  | 6.8±0.0       | 6.2±0.0  | 6.8±0.0       | 6.8±0.0  |
| TetraTetraPentaAnh                       | 6.6±0.1                           | 6.2±0.0  | 6.4±0.0       | 5.7±0.1  | 6.7±0.0       | 6.6±0.0  |
| TetraTetraTetraPentaAnh I                | 1.4±0.0                           | 1.0±0.0  | 1.3±0.0       | 1.1±0.2  | 1.4±0.0       | 2.0±0.0  |
| TetraTetraTetraPentaAnh II               | 1.4±0.0                           | 1.3±0.0  | 1.5±0.0       | 1.2±0.0  | 1.7±0.0       | 1.8±0.0  |
| TetraTetraTetradiAnh                     | 1.4±0.0                           | 1.5±0.0  | 1.8±0.0       | 1.4±0.5  | 1.4±0.0       | 1.6±0.7  |
| TetraTetraTetraPentadiAnh                | 1.8±0.3                           | 1.3±0.0  | 1.9±0.2       | 1.1±0.0  | 2.3±0.0       | 1.6±0.3  |
| TetraTetradiAnh                          | 1.8±0.0                           | 1.3±0.0  | 1.2±0.4       | 1.0±0.0  | 2.7±0.0       | 1.6±0.0  |
| TetraTetraPentadiAnh                     | 0.7±0.0                           | 0.4±0.0  | 0.7±0.0       | 0.4±0.0  | 0.9±0.0       | 0.8±0.0  |
| all known                                | 83.3±0.6                          | 82.5±4.7 | 87.7±0.5      | 80.3±0.0 | 86.5±0.0      | 83.4±0.2 |
| Monomers (total)                         | 33.0±0.1                          | 27.0±4.5 | 36.0±1.1      | 30.1±4.3 | 34.6±0.3      | 29.0±0.4 |
| Dimers (total)                           | 35.6±3.4                          | 37.2±0.0 | 32.9±0.7      | 34.8±1.6 | 32.2±0.0      | 32.3±0.0 |
| Trimers (total)                          | 26.0±0.5                          | 30.2±3.7 | 25.9±0.1      | 29.9±4.1 | 27.0±0.1      | 32.2±1.7 |
| Tetramers (total)                        | 5.4±0.6                           | 5.5±0.2  | 5.3±0.2       | 5.2±1.4  | 6.2±0.0       | 6.5±0.4  |
| Tripeptides (total)                      | 3.0±0.0                           | 6.4±0.6  | 3.1±0.0       | 9.3±1.3  | 0.5±0.0       | 0.8±0.0  |
| Tetrapeptides (total)                    | 74.7±0.0                          | 71.9±2.5 | 74.5±0.3      | 69.2±1.3 | 77.6±0.0      | 75.4±0.2 |
| Pentapeptides (total)                    | 21.7±0.0                          | 21.1±0.5 | 21.6±0.0      | 20.2±0.0 | 21.5±0.0      | 23.2±0.2 |
| 3-3 crosslinks                           | 2.3±0.6                           | 5.2±0.7  | 1.0±0.0       | 4.2±0.6  | 0.6±0.0       | 0.9±0.0  |
| Chain ends (Anh)                         | 16.5±0.2                          | 17.2±0.9 | 14.2±1.2      | 14.5±0.8 | 17.0±0.0      | 17.4±0.3 |
| Degree of cross-linkage                  | 39.2±0.0                          | 42.9±2.2 | 37.6±0.4      | 41.2±1.2 | 38.8±0.1      | 42.5±0.2 |
| % peptides in cross-links                | 67.0±0.1                          | 73.0±4.5 | 64.0±1.1      | 69.9±4.3 | 65.4±0.3      | 71.0±0.4 |
| Mean of disaccharides units ± SD (n=2)   |                                   |          |               |          |               |          |
| Average glycan chain length              | 6.0±0.1                           | 5.8±0.1  | 7.1±0.3       | 6.9±0.2  | 5.9±0.0       | 5.8±0.0  |
