# Supplementary material for: A specialized MreB-dependent cell wall biosynthetic complex mediates the formation of stalk-specific peptidoglycan in Caulobacter crescentus
Source: PubMed Central journal article supplement (PMC6373972; doi:10.1371/journal.pgen.1007897), 2019-02-01
Supplement: pgen.1007897.s013.pdf [file pgen.1007897.s013.pdf]

**Table S2.** List of peptidoglycan biosynthesis mutants analyzed for stalk defects.***LytM-like endopeptidases***

|                           |                                                                                                                                                                                                                                                                                                               |
|---------------------------|---------------------------------------------------------------------------------------------------------------------------------------------------------------------------------------------------------------------------------------------------------------------------------------------------------------|
| <b>Locus Tags</b>         | <i>ldpA</i> (CC1872, CCNA_01948), <i>ldpB</i> (CC2248, CCNA_02331), <i>ldpC</i> (CC2297, CCNA_02382), <i>ldpD</i> (CC3034 CCNA_03129), <i>ldpE</i> (CC3301, CCNA_03410), <i>ldpF</i> (CC3434, CCNA_03547), <i>dipM</i> (CC1996 CCNA_02075)                                                                    |
| <b>Single deletion</b>    | $\Delta ldpA$ , $\Delta ldpB$ , $\Delta ldpC$ , $\Delta ldpD$ , $\Delta ldpE$ , $\Delta ldpF$ , $\Delta dipM$                                                                                                                                                                                                 |
| <b>Multiple deletions</b> | $\Delta ldpA \Delta ldpB \Delta ldpC \Delta ldpD \Delta ldpE$ , $\Delta ldpA \Delta ldpB$ , $\Delta ldpB \Delta ldpF$ , $\Delta ldpA \Delta ldpB \Delta ldpC$ , $\Delta ldpA \Delta ldpC \Delta ldpD$ , $\Delta ldpC \Delta ldpE$ , $\Delta ldpA \Delta ldpB \Delta ldpC \Delta ldpD \Delta ldpE \Delta ldpF$ |

***NlpC/P60 and CHAP domain proteins***

|                           |                                                                             |
|---------------------------|-----------------------------------------------------------------------------|
| <b>Locus Tags</b>         | CC2936 (CCNA_03031), CC0349 (CCNA_00354), CC2775 (CCNA_02863)               |
| <b>Single deletions</b>   | $\Delta CC2936$ , $\Delta CC0349$ , $\Delta CC2775$                         |
| <b>Multiple deletions</b> | $\Delta CC2775 \Delta CC2936$ , $\Delta CC2936 \Delta CC0349 \Delta CC2775$ |

***Soluble lytic transglycosylases***

|                           |                                                                                                      |
|---------------------------|------------------------------------------------------------------------------------------------------|
| <b>Locus Tags</b>         | <i>sdpA</i> (CC1194, CCNA_01252), <i>sdpB</i> (CC1332, CCNA_01393), <i>sdpC</i> (CC2416, CCNA_02498) |
| <b>Single deletions</b>   | $\Delta sdpA$ , $\Delta sdpB$ , $\Delta sdpC$                                                        |
| <b>Multiple deletions</b> | $\Delta sdpB \Delta sdpC$ , $\Delta sdpA \Delta sdpC$ , $\Delta sdpA \Delta sdpB$                    |

***Membrane-bound lytic transglycosylases***

|                           |                                          |
|---------------------------|------------------------------------------|
| <b>Locus Tags</b>         | CC3740 (CCNA_03856), CC3322 (CCNA_03431) |
| <b>Single deletions</b>   | $\Delta CC3740$ , $\Delta CC3322$        |
| <b>Multiple deletions</b> | $\Delta CC3740 \Delta CC3322$            |

***Amidase***

|                         |                                                                 |
|-------------------------|-----------------------------------------------------------------|
| <b>Locus Tags</b>       | <i>amiC</i> (CC1876, CCNA_01952)                                |
| <b>Single deletions</b> | $\Delta amiC$ P <sub>xyl</sub> ::P <sub>xyl</sub> - <i>amiC</i> |

***Carboxypeptidase***

|                         |                                  |
|-------------------------|----------------------------------|
| <b>Locus Tags</b>       | <i>crbA</i> (CC2161, CCNA_02243) |
| <b>Single deletions</b> | $\Delta CC2161$                  |

***LD-transpeptidases***

|                           |                                                                    |
|---------------------------|--------------------------------------------------------------------|
| <b>Locus Tags</b>         | <i>ldtD</i> (CC1511, CCNA_01579), <i>ldtX</i> (CC3744, CCNA_03860) |
| <b>Single deletions</b>   | $\Delta ldtD$ , $\Delta ldtX$                                      |
| <b>Multiple deletions</b> | $\Delta ldtD \Delta ldtX$                                          |

***Penicillin-binding proteins (class A)***

|                           |                                                                                                                                                                                                    |
|---------------------------|----------------------------------------------------------------------------------------------------------------------------------------------------------------------------------------------------|
| <b>Locus Tags</b>         | <i>pbpY</i> (CC1875, CCNA_01951), <i>pbp1A</i> (CC1516, CCNA_01584), <i>pbpC</i> (CC3277, CCNA_03386), <i>pbpZ</i> (CC3570, CCNA_03685), <i>pbpX</i> (CC0252, CCNA_00252)                          |
| <b>Single deletions</b>   | $\Delta pbpC$ , $\Delta pbpX$                                                                                                                                                                      |
| <b>Multiple deletions</b> | $\Delta pbp1a \Delta pbpC \Delta pbpY \Delta pbpZ$ , $\Delta pbp1a \Delta pbpY \Delta pbpZ$ , $\Delta pbp1a \Delta pbpC \Delta pbpY \Delta pbpZ$ P <sub>xyl</sub> ::P <sub>xyl</sub> - <i>pbpX</i> |
