# Supplementary material for: A specialized MreB-dependent cell wall biosynthetic complex mediates the formation of stalk-specific peptidoglycan in Caulobacter crescentus
Source: PubMed Central journal article supplement (PMC6373972; doi:10.1371/journal.pgen.1007897), 2019-02-01
Supplement: pgen.1007897.s014.pdf [file pgen.1007897.s014.pdf]

**Table S3. Composition of peptidoglycan isolated from autolysin-deficient cells.** The indicated strains were analyzed after growth for 24 h in M2G<sup>P</sup>. The values are the mean ± variance of two independent experiments.

| Muropeptide                              | Relative percentage (%) in strain |              |              |              |               |
|------------------------------------------|-----------------------------------|--------------|--------------|--------------|---------------|
|                                          | WT                                | <i>ΔdipM</i> | <i>ΔcrbA</i> | <i>ΔldpA</i> | <i>ΔsdpAB</i> |
| Tri                                      | 0.9±0.0                           | 1.8±0.1      | 0.6±0.0      | 1.1±0.0      | 4.3±2.1       |
| Tetra                                    | 17.5±0.0                          | 21.3±0.5     | 9.8±0.5      | 18.2±0.1     | 27.5±1.8      |
| Penta                                    | 7.9±0.1                           | 8.1±0.3      | 11.0±0.0     | 7.4±0.0      | 6.6±0.0       |
| TriTri (LD)                              | 0.2±0.0                           | 0.2±0.0      | 0.2±0.0      | 0.2±0.0      | 0.5±0.0       |
| TetraTri (LD)                            | 1.1±0.0                           | 0.9±0.0      | 0.2±0.0      | 0.8±0.0      | 1.9±0.0       |
| TriAnh +small amount of TetraTri (LD)    | 0.9±0.0                           | 1.0±0.0      | 0.5±0.0      | 0.9±0.0      | 1.6±0.3       |
| TetraTetra (LD)                          | 0.2±0.0                           | 0.5±0.0      | 1.1±0.0      | 0.9±0.5      | 0.6±0.0       |
| TetraTetra                               | 15.1±0.0                          | 15.9±0.0     | 10.8±0.3     | 15.8±0.0     | 16.7±0.8      |
| TetraPenta                               | 7.3±0.2                           | 7.3±0.1      | 12.1±0.1     | 7.1±0.1      | 5.3±0.0       |
| TetraTetraTri or TetraTetraTri (LD)      | 0.4±0.0                           | 0.3±0.0      | 0.3±0.0      | 0.3±0.0      | 0.4±0.0       |
| TetraAnh                                 | 0.3±0.0                           | 0.5±0.0      | 0.2±0.0      | 0.5±0.0      | 0.8±0.0       |
| TetraTetraTetra                          | 4.4±0.1                           | 4.5±0.0      | 3.5±0.2      | 4.6±0.0      | 5.5±0.2       |
| TetraTetraPenta                          | 1.8±0.0                           | 1.8±0.0      | 3.6±0.0      | 1.8±0.0      | 1.5±0.0       |
| TetraTetraTetraTetra                     | 0.8±0.0                           | 0.8±0.0      | 0.6±0.0      | 0.8±0.0      | 1.1±0.0       |
| TetraTetraTetraPenta                     | 0.4±0.0                           | 0.4±0.0      | 0.6±0.0      | 0.4±0.0      | 0.4±0.0       |
| PentaAnh                                 | 0.8±0.0                           | 0.8±0.0      | 0.8±0.0      | 0.8±0.0      | 1.7±0.0       |
| TetraTetraAnh                            | 4.3±0.0                           | 3.9±0.0      | 3.0±0.0      | 4.1±0.0      | 2.6±0.0       |
| TetraPentaAnh                            | 0.9±0.0                           | 0.8±0.0      | 0.4±0.1      | 0.6±0.0      | 0.9±0.1       |
| TetraTetraTriAnh or TetraTetraTri(LD)Anh | n.d.                              | n.d.         | n.d.         | n.d.         | n.d.          |
| TetraTetraTetraAnh                       | 7.6±0.1                           | 7.1±0.0      | 5.6±0.0      | 7.6±0.0      | 6.4±0.0       |
| TetraTetraPentaAnh                       | 6.4±0.5                           | 5.9±0.1      | 7.0±0.0      | 7.0±0.0      | 4.0±0.0       |
| TetraTetraTetraPentaAnh I                | 1.2±0.0                           | 1.2±0.0      | 1.3±0.0      | 1.3±0.0      | 1.0±0.0       |
| TetraTetraTetraPentaAnh II               | 1.3±0.0                           | 1.3±0.0      | 2.3±0.0      | 1.4±0.0      | 0.7±0.0       |
| TetraTetraTetradiAnh                     | 1.1±0.0                           | 1.0±0.0      | 1.1±0.0      | 1.2±0.0      | 0.5±0.0       |
| TetraTetraTetraPentadiAnh                | 0.9±0.0                           | 0.9±0.0      | 1.3±0.0      | 1.0±0.0      | 0.3±0.0       |
| TetraTetradiAnh                          | 1.5±0.0                           | 1.4±0.0      | 1.8±0.0      | 1.5±0.0      | 0.4±0.0       |
| TetraTetraPentadiAnh                     | 0.7±0.0                           | 0.6±0.0      | 1.2±0.0      | 0.7±0.0      | 0.3±0.0       |
| all known                                | 85.7±1.7                          | 90.1±1.0     | 80.6±0.0     | 87.9±0.1     | 93.4±0.5      |
| Monomers (total)                         | 32.9±0.5                          | 37.3±2.1     | 28.4±0.2     | 32.9±0.1     | 45.4±1.5      |
| Dimers (total)                           | 35.7±1.7                          | 34.1±0.0     | 36.5±1.4     | 35.2±1.1     | 31.0±0.2      |
| Trimers (total)                          | 26.0±1.5                          | 23.6±1.1     | 27.6±1.3     | 26.5±0.1     | 20.0±0.4      |
| Tetramers (total)                        | 5.4±0.6                           | 5.1±0.3      | 7.4±0.2      | 5.5±0.3      | 3.7±0.0       |
| Tripeptides (total)                      | 3.1±0.0                           | 4.0±0.2      | 1.8±0.3      | 3.0±0.0      | 8.1±5.4       |
| Tetrapeptides (total)                    | 77.1±0.2                          | 77.0±0.6     | 68.9±0.6     | 77.9±0.0     | 76.3±6.9      |
| Pentapeptides (total)                    | 19.5±0.1                          | 18.5±0.2     | 29.0±0.0     | 18.5±0.1     | 14.8±0.0      |
| 3-3 crosslinks                           | 1.0±0.0                           | 1.0±0.0      | 1.0±0.0      | 1.2±0.2      | 1.8±0.0       |
| Chain ends (Anh)                         | 15.0±0.2                          | 13.9±0.1     | 15.2±0.4     | 15.1±0.0     | 11.6±1.0      |
| Degree of cross-linkage                  | 39.2±0.6                          | 36.6±1.1     | 42.2±0.2     | 39.3±0.0     | 31.6±0.5      |
| % Peptides in crosslinks                 | 67.1±0.5                          | 62.7±2.1     | 71.6±0.2     | 67.1±0.1     | 54.6±1.5      |
| Mean of disaccharides units ± SD (n=2)   |                                   |              |              |              |               |
| Average glycan chain length              | 6.7±0.0                           | 7.2±0.0      | 6.6±0.1      | 6.6±0.0      | 8.6±0.6       |
