# Supplementary material for: A specialized MreB-dependent cell wall biosynthetic complex mediates the formation of stalk-specific peptidoglycan in Caulobacter crescentus
Source: PubMed Central journal article supplement (PMC6373972; doi:10.1371/journal.pgen.1007897), 2019-02-01
Supplement: pgen.1007897.s015.pdf [file pgen.1007897.s015.pdf]

**Table S4.** Composition of peptidoglycan isolated from cells with defects in scaffolding proteins. Strains MT257 ( $\Delta bacA$ ), MAB238 ( $mreB::mreB^{SW}$ ), and NA1000 (WT) were grown for 24 h in M2G<sup>-P</sup> prior to analysis. Strains CJW2747 ( $\Delta rodZ::\Omega$  P<sub>xyI</sub>::P<sub>xyI</sub>-rodZ) and LS3809 ( $\Delta mreB$  P<sub>xyI</sub>::P<sub>xyI</sub>-mreB) were first cultivated for 7 h in PYE and then grown for 24 h in M2G<sup>-P</sup>. Values are the mean  $\pm$  variance of two independent experiments.

| Muropeptide                                                | Relative percentage (%) in strain |                |                |                |                    |
|------------------------------------------------------------|-----------------------------------|----------------|----------------|----------------|--------------------|
|                                                            | WT                                | $\Delta bacA$  | RodZ depl.     | MreB depl.     | MreB <sup>SW</sup> |
| Tri                                                        | 0.9 $\pm$ 0.0                     | 1.4 $\pm$ 0.0  | 5.0 $\pm$ 0.0  | 5.1 $\pm$ 0.1  | 3.8 $\pm$ 0.0      |
| Tetra                                                      | 17.5 $\pm$ 0.0                    | 19.6 $\pm$ 0.0 | 17.7 $\pm$ 0.2 | 17.4 $\pm$ 0.0 | 19.2 $\pm$ 0.1     |
| Penta                                                      | 7.9 $\pm$ 0.1                     | 8.0 $\pm$ 0.1  | 8.3 $\pm$ 0.0  | 8.7 $\pm$ 0.0  | 7.3 $\pm$ 0.0      |
| TriTri (LD)                                                | 0.2 $\pm$ 0.0                     | 0.2 $\pm$ 0.0  | 0.8 $\pm$ 0.0  | 1.0 $\pm$ 0.0  | 0.5 $\pm$ 0.0      |
| TetraTri (LD)                                              | 1.1 $\pm$ 0.0                     | 0.7 $\pm$ 0.0  | 1.9 $\pm$ 0.0  | 2.5 $\pm$ 0.0  | 1.9 $\pm$ 0.0      |
| TriAnh/TetraTri (LD)                                       | 0.9 $\pm$ 0.0                     | 1.1 $\pm$ 0.0  | 3.6 $\pm$ 0.0  | 3.7 $\pm$ 0.0  | 3.0 $\pm$ 0.0      |
| TetraTetra (LD)                                            | 0.2 $\pm$ 0.0                     | 0.4 $\pm$ 0.0  | 1.1 $\pm$ 0.0  | 1.3 $\pm$ 0.0  | 0.9 $\pm$ 0.0      |
| TetraTetra                                                 | 15.1 $\pm$ 0.0                    | 16.8 $\pm$ 0.2 | 13.6 $\pm$ 0.0 | 13.3 $\pm$ 0.1 | 15.8 $\pm$ 0.0     |
| TetraPenta                                                 | 7.3 $\pm$ 0.2                     | 7.7 $\pm$ 0.0  | 6.4 $\pm$ 0.0  | 6.8 $\pm$ 0.0  | 5.9 $\pm$ 0.0      |
| TetraTetraTri or<br>TetraTetraTri (LD)                     | 0.4 $\pm$ 0.0                     | 0.3 $\pm$ 0.0  | 0.6 $\pm$ 0.0  | 0.7 $\pm$ 0.0  | 0.6 $\pm$ 0.0      |
| TetraAnh                                                   | 0.3 $\pm$ 0.0                     | 0.5 $\pm$ 0.0  | 0.9 $\pm$ 0.0  | 0.8 $\pm$ 0.0  | 0.8 $\pm$ 0.0      |
| TetraTetraTetra                                            | 4.4 $\pm$ 0.1                     | 5.0 $\pm$ 0.0  | 3.7 $\pm$ 0.0  | 3.1 $\pm$ 0.0  | 4.4 $\pm$ 0.0      |
| TetraTetraPenta                                            | 1.8 $\pm$ 0.0                     | 1.9 $\pm$ 0.0  | 1.4 $\pm$ 0.0  | 1.3 $\pm$ 0.0  | 1.3 $\pm$ 0.0      |
| TetraTetraTetraTetra                                       | 0.8 $\pm$ 0.0                     | 0.9 $\pm$ 0.0  | 0.3 $\pm$ 0.0  | 0.3 $\pm$ 0.0  | 0.2 $\pm$ 0.0      |
| TetraTetraTetraPenta                                       | 0.4 $\pm$ 0.0                     | 0.4 $\pm$ 0.0  | 0.1 $\pm$ 0.0  | 0.2 $\pm$ 0.0  | 0.1 $\pm$ 0.0      |
| PentaAnh                                                   | 0.8 $\pm$ 0.0                     | 0.9 $\pm$ 0.0  | 0.6 $\pm$ 0.0  | 0.5 $\pm$ 0.0  | 0.7 $\pm$ 0.0      |
| TetraTetraAnh                                              | 4.3 $\pm$ 0.0                     | 4.2 $\pm$ 0.0  | 0.7 $\pm$ 0.0  | 0.7 $\pm$ 0.0  | 0.6 $\pm$ 0.0      |
| TetraPentaAnh                                              | 0.9 $\pm$ 0.0                     | 0.8 $\pm$ 0.0  | 2.2 $\pm$ 0.0  | 2.2 $\pm$ 0.0  | 2.2 $\pm$ 0.0      |
| TetraTetraTriAnh or<br>TetraTetraTri(LD)Anh                | n.d.                              | n.d.           | 1.5 $\pm$ 0.0  | 1.5 $\pm$ 0.0  | 1.4 $\pm$ 0.0      |
| TetraTetraTetraAnh                                         | 7.6 $\pm$ 0.1                     | 7.0 $\pm$ 0.0  | 5.5 $\pm$ 0.0  | 4.9 $\pm$ 0.1  | 6.1 $\pm$ 0.0      |
| TetraTetraPentaAnh                                         | 6.4 $\pm$ 0.5                     | 6.1 $\pm$ 0.0  | 4.3 $\pm$ 0.1  | 4.1 $\pm$ 0.0  | 4.7 $\pm$ 0.0      |
| TetraTetraTetraPentaAnh I                                  | 1.2 $\pm$ 0.0                     | 1.3 $\pm$ 0.0  | 0.6 $\pm$ 0.0  | 0.4 $\pm$ 0.0  | 0.7 $\pm$ 0.0      |
| TetraTetraTetraPentaAnh II                                 | 1.3 $\pm$ 0.0                     | 1.3 $\pm$ 0.0  | 0.6 $\pm$ 0.0  | 0.5 $\pm$ 0.0  | 0.7 $\pm$ 0.0      |
| TetraTetraTetradiAnh                                       | 1.1 $\pm$ 0.0                     | 1.0 $\pm$ 0.0  | 1.0 $\pm$ 0.0  | 0.7 $\pm$ 0.0  | 0.9 $\pm$ 0.0      |
| TetraTetraTetraPentadiAnh                                  | 0.9 $\pm$ 0.0                     | 0.9 $\pm$ 0.0  | 1.3 $\pm$ 0.0  | 1.0 $\pm$ 0.0  | 1.3 $\pm$ 0.0      |
| TetraTetradiAnh                                            | 1.5 $\pm$ 0.0                     | 1.2 $\pm$ 0.0  | 1.3 $\pm$ 0.0  | 1.1 $\pm$ 0.0  | 1.2 $\pm$ 0.0      |
| TetraTetraPentadiAnh                                       | 0.7 $\pm$ 0.0                     | 0.6 $\pm$ 0.0  | 0.4 $\pm$ 0.0  | 0.4 $\pm$ 0.0  | 0.3 $\pm$ 0.0      |
| all known                                                  | 85.7 $\pm$ 1.7                    | 90.2 $\pm$ 0.0 | 85.3 $\pm$ 0.1 | 84.4 $\pm$ 0.2 | 86.4 $\pm$ 0.1     |
| Monomers (total)                                           | 32.9 $\pm$ 0.5                    | 35.1 $\pm$ 0.0 | 38.2 $\pm$ 0.6 | 38.6 $\pm$ 0.3 | 36.8 $\pm$ 0.2     |
| Dimers (total)                                             | 35.7 $\pm$ 1.7                    | 35.4 $\pm$ 0.0 | 36.9 $\pm$ 0.1 | 38.7 $\pm$ 0.0 | 36.8 $\pm$ 0.0     |
| Trimers (total)                                            | 26.0 $\pm$ 1.5                    | 24.3 $\pm$ 0.0 | 21.5 $\pm$ 0.2 | 19.7 $\pm$ 0.1 | 22.8 $\pm$ 0.1     |
| Tetramers (total)                                          | 5.4 $\pm$ 0.6                     | 5.2 $\pm$ 0.0  | 3.4 $\pm$ 0.0  | 2.9 $\pm$ 0.0  | 3.5 $\pm$ 0.0      |
| Tripeptides (total)                                        | 3.1 $\pm$ 0.0                     | 3.5 $\pm$ 0.0  | 10.8 $\pm$ 0.0 | 11.8 $\pm$ 0.4 | 8.5 $\pm$ 0.1      |
| Tetrapeptides (total)                                      | 77.1 $\pm$ 0.2                    | 77.0 $\pm$ 0.0 | 70.6 $\pm$ 0.0 | 69.1 $\pm$ 0.6 | 74.3 $\pm$ 0.0     |
| Pentapeptides (total)                                      | 19.5 $\pm$ 0.1                    | 18.9 $\pm$ 0.0 | 18.6 $\pm$ 0.0 | 19.1 $\pm$ 0.0 | 17.2 $\pm$ 0.0     |
| 3-3 crosslinks                                             | 1.0 $\pm$ 0.0                     | 0.8 $\pm$ 0.0  | 3.0 $\pm$ 0.0  | 3.7 $\pm$ 0.0  | 2.6 $\pm$ 0.0      |
| Chain ends (Anh)                                           | 15.0 $\pm$ 0.2                    | 14.1 $\pm$ 0.0 | 11.3 $\pm$ 0.0 | 10.4 $\pm$ 0.0 | 11.4 $\pm$ 0.1     |
| Degree of cross-linkage                                    | 39.2 $\pm$ 0.6                    | 37.8 $\pm$ 0.0 | 35.3 $\pm$ 0.2 | 34.7 $\pm$ 0.1 | 36.3 $\pm$ 0.1     |
| % peptides in cross-links                                  | 67.1 $\pm$ 0.5                    | 64.9 $\pm$ 0.0 | 61.8 $\pm$ 0.6 | 61.4 $\pm$ 0.3 | 63.2 $\pm$ 0.2     |
| Mean of disaccharides units $\pm$ standard deviation (n=2) |                                   |                |                |                |                    |
| Average glycan chain length                                | 6.7 $\pm$ 0.0                     | 7.1 $\pm$ 0.0  | 8.8 $\pm$ 0.0  | 9.6 $\pm$ 0.0  | 8.8 $\pm$ 0.0      |
